# Supplementary material for: Don’t lose samples to estimation
Source: PubMed Central journal article supplement — Patterns (N Y). 2022 Dec 9;3(12):100612. doi: 10.1016/j.patter.2022.100612 (PMC9782254; doi:10.1016/j.patter.2022.100612), 2022-12-09
Supplement: mmc1.pdf [file mmc1.pdf]

**Patterns, Volume 3**

**Supplemental information**

**Don't lose samples to estimation**

**Ioannis Tsamardinos**

## Experimentation setting

- Simulate hold-out test sets of 50 samples
- All Learners have true accuracy 85%
- They make independent predictions and errors

## One Pipeline: No problem

- Estimate performance of a single learner using a hold-out test set of 50 samples; simulated trial #1

| Algorithm | Hyper-Parameter | Test Accuracy |
|-----------|-----------------|---------------|
| K-NN      | K=1             | 0.9           |
|           |                 |               |
|           |                 |               |
|           |                 |               |
|           |                 |               |
|           |                 |               |
|           |                 |               |
|           |                 |               |
|           |                 |               |

Assume: **true accuracy 85%**

## One Pipeline : No problem

- Estimate performance of a single algorithm using a hold-out test set of 50 samples; simulated trial #2

| Algorithm | Hyper-Parameter | Test Accuracy |
|-----------|-----------------|---------------|
| K-NN      | K=1             | 0.7           |
|           |                 |               |
|           |                 |               |
|           |                 |               |
|           |                 |               |
|           |                 |               |
|           |                 |               |
|           |                 |               |
|           |                 |               |

Assume: **true accuracy 85%**

## One Pipeline : No problem

- Estimate performance of a single algorithm using a hold-out test set of 50 samples ; simulated trial #3

| Algorithm | Hyper-Parameter | Test Accuracy |
|-----------|-----------------|---------------|
| K-NN      | K=1             | 0.87          |
|           |                 |               |
|           |                 |               |
|           |                 |               |
|           |                 |               |
|           |                 |               |
|           |                 |               |
|           |                 |               |

Assume: **true accuracy 85%**

## One Pipeline : No problem

- Estimate performance of a single algorithm using a hold-out test set of 50 samples; 1000 simulated trials

| Algorithm | Hyper-Parameter | Test Accuracy |
|-----------|-----------------|---------------|
| K-NN      | K=1             | 0.842         |
|           |                 |               |
|           |                 |               |
|           |                 |               |
|           |                 |               |
|           |                 |               |
|           |                 |               |
|           |                 |               |
|           |                 |               |

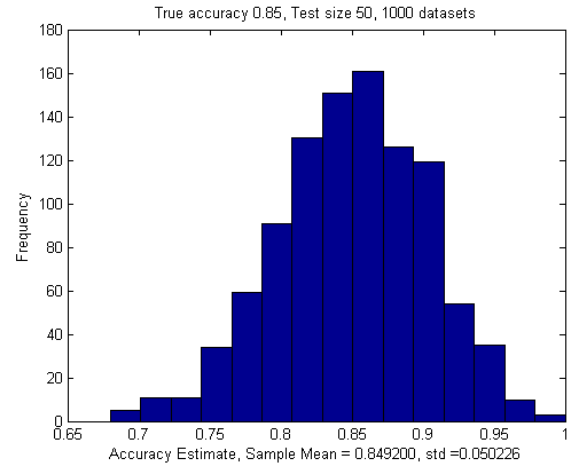

Assume: **true accuracy 85%**

Mean estimate = 0.842

**On average, using held-out test data (or CV) will estimate the correct true accuracy when test data are seen by a single pipeline and corresponding model**

## Many Configurations: Overestimation!

- Estimate performance of 8 learners using a hold-out test set of 50 samples ; return the estimate of the best one; simulated trial #1

| Algorithm | Hyper-Parameter | Test Accuracy |
|-----------|-----------------|---------------|
| K-NN      | K=1             | 0.87          |
|           | K=2             | 0.90          |
|           | K=5             | 0.86          |
| DT        | MaxPChance=0.01 | 0.7           |
|           | MaxPChance=0.05 | 0.8           |
|           | MaxPChance=0.1  | <b>0.9</b>    |
| SB        | l = 0           | 0.60          |
|           | l=1             | 0.90          |

Assume: **true accuracies 85% (all learners); independent predictions by each learner**

## Many Configurations: Overestimation!

- Estimate performance of 8 learners using a hold-out test set of 50 samples ; return the estimate of the best one; simulated trial #2

| Algorithm | Hyper-Parameter | Test Accuracy |
|-----------|-----------------|---------------|
| K-NN      | K=1             | <b>0.95</b>   |
|           | K=2             | 0.90          |
|           | K=5             | 0.80          |
| DT        | MaxPChance=0.01 | 0.76          |
|           | MaxPChance=0.05 | 0.78          |
|           | MaxPChance=0.1  | 0.78          |
| SB        | l = 0           | 0.80          |
|           | l=1             | 0.88          |

Assume: **true accuracies 85% and independent predictions by each learner**



## Many Configurations: Overestimation!

- Estimate performance of 8 learners using a hold-out test set of 50 samples ; return the estimate of the best one; simulated trial #3

| Algorithm | Hyper-Parameter | Test Accuracy |
|-----------|-----------------|---------------|
| K-NN      | K=1             | 0.68          |
|           | K=2             | 0.75          |
|           | K=5             | 0.79          |
| DT        | MaxPChance=0.01 | <b>0.92</b>   |
|           | MaxPChance=0.05 | 0.85          |
|           | MaxPChance=0.1  | 0.88          |
| SB        | l = 0           | 0.90          |
|           | l=1             | 0.88          |

Assume: **true accuracies 85% and independent predictions by each learner**

## Many Configurations: Overestimation!

- Estimate performance of a single algorithm using a hold-out test set of 50 samples; 1000 simulated trials

| Algorithm | Hyper-Parameter | Estimate |
|-----------|-----------------|----------|
| K-NN      | K=1             | 0.916    |
|           | K=2             |          |
|           | K=5             |          |
| DT        | MaxPChance=0.01 |          |
|           | MaxPChance=0.05 |          |
|           | MaxPChance=0.1  |          |
| SB        | = 0             |          |
|           | =1              |          |

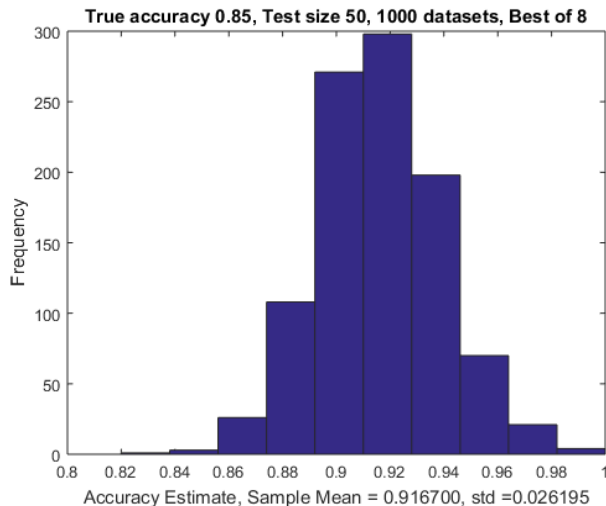

**On average, the accuracy of the winning learner is over-estimated, when selected among many tries;** see [Tsamardinos et. al. Machine Learning Journal 2018 for a theoretical proof].

Assume: **true accuracy 85%**  
 Mean Estimate: **0.916**
