# Supplementary material for: Don’t lose samples to estimation
Source: PubMed Central journal article supplement — Patterns (N Y). 2022 Dec 9;3(12):100612. doi: 10.1016/j.patter.2022.100612 (PMC9782254; doi:10.1016/j.patter.2022.100612), 2022-12-09
Supplement: mmc2.pdf [file mmc2.pdf]

Cite as: Ioannis Tsamardinos, Vincenzo Lagani, Automated Machine Learning and Knowledge Discovery, ECCB 2018 Tutorial;

Slides are a modified excerpt from the ECCB 2018 tutorial

# Automated Machine Learning and Knowledge Discovery

---

IOANNIS TSAMARDINOS

PROFESSOR, CSD, UNIVERSITY OF CRETE

GNOSIS DATA ANALYSIS, CO-FOUNDER

VINCENZO LAGANI

ILIA STATE UNIVERSITY

GNOSIS DATA ANALYSIS, CO-FOUNDER

# A fictional execution trace of Nested Cross Validation (NCV)

---

- Choose among Pipelines (Learners)  $a, b$
- Split data to 3 Folds named 1, 2, 3
- All accuracies reported as fictional estimates
  
- Inner Cross-Validation loop: cross-validation of a single pipeline to determine the winning pipeline
- Outer Cross-Validation loop: cross-validation of the selecting-the-winner procedure to determine the predictive performance of the winning pipelines

# NCV Trace: Model Production

- Choose among Pipelines (learners)  $a, b$
- Split data to Folds 1, 2, 3

| Train On            | With Pipeline | Produce | Apply on | Accuracy                      |
|---------------------|---------------|---------|----------|-------------------------------|
| 1, 2                | a             | $M_1$   | 3        | 0.7                           |
| 1, 3                | a             | $M_2$   | 2        | 0.8                           |
| 2, 3                | a             | $M_3$   | 1        | 0.6                           |
|                     |               |         |          | <b>Mean<sub>a</sub> = 0.7</b> |
| 1, 2                | b             | $M_4$   | 3        | 0.6                           |
| 1, 3                | b             | $M_5$   | 2        | 0.7                           |
| 2, 3                | b             | $M_6$   | 1        | 0.5                           |
|                     |               |         |          | <b>Mean<sub>b</sub> = 0.6</b> |
| Select a as winning |               |         |          |                               |
| 1, 2, 3             | a             | $M_7$   | N/A      |                               |

Model Performances on held out fold

No direct estimation of the performance of the returned model.  
No loss of data to estimation

**Final Model to return using Cross Validation with Tuning (CVT):  $M_7$**

# NCV Trace: Performance Estimation (1 of 3)

- Outer loop iteration 1
- Fold 3 is held-out as an Estimation set ; the other folds serve as Tune sets in the inner CV loop.

| Train On            | With Pipel. | Produce  | Apply on | Accuracy                       |
|---------------------|-------------|----------|----------|--------------------------------|
| 1                   | a           | $M_8$    | 2        | 0.7                            |
| 2                   | a           | $M_9$    | 1        | 0.8                            |
|                     |             |          |          | <b>Mean<sub>a</sub> = 0.75</b> |
| 1                   | b           | $M_{10}$ | 2        | 0.6                            |
| 2                   | b           | $M_{11}$ | 1        | 0.7                            |
|                     |             |          |          | <b>Mean<sub>a</sub> = 0.65</b> |
| Select a as winning |             |          |          |                                |
| 1, 2                | a           | $M_{12}$ | <b>3</b> | <b>0.9</b>                     |

Folds 1 and 2 (inner loop folds) serve multiple times as Tune sets

Fold 3 (outer loop folds) serves a single time as an Estimation set.

# NCV Trace: Performance Estimation (2 of 3)

- Outer loop iteration 2
- Fold 2 is held-out as an Estimation set ; the other folds serve as Tune sets in the inner CV loop.

| Train On | With Pipel. | Produce  | Apply on | Accuracy                       |
|----------|-------------|----------|----------|--------------------------------|
| 1        | a           | $M_{13}$ | 3        | 0.6                            |
| 3        | a           | $M_{14}$ | 1        | 0.7                            |
|          |             |          |          | <b>Mean<sub>a</sub> = 0.65</b> |
| 1        | b           | $M_{15}$ | 3        | 0.7                            |
| 3        | b           | $M_{16}$ | 1        | 0.8                            |
|          |             |          |          | <b>Mean<sub>a</sub> = 0.75</b> |
| Select b |             |          |          |                                |
| 1, 3     | b           | $M_{17}$ | <b>2</b> | <b>0.7</b>                     |

# NCV Trace: Performance Estimation (3 of 3)

- Outer loop iteration 3
- Fold 1 is held-out as an Estimation set ; the other folds serve as Tune sets in the inner CV loop.

| Train On | With Pipel. | Produce  | Apply on | Accuracy                      |
|----------|-------------|----------|----------|-------------------------------|
| 2        | a           | $M_{18}$ | 3        | 0.8                           |
| 3        | a           | $M_{19}$ | 2        | 0.6                           |
|          |             |          |          | <b>Mean<sub>a</sub> = 0.7</b> |
| 2        | b           | $M_{20}$ | 3        | 0.6                           |
| 3        | b           | $M_{21}$ | 2        | 0.6                           |
|          |             |          |          | <b>Mean<sub>a</sub> = 0.6</b> |
| Select a |             |          |          |                               |
| 2, 3     | a           | $M_{22}$ | <b>1</b> | <b>0.8</b>                    |

**Final Estimate to return is the Learner performance** : mean accurate on Estimation folds over three iterations  $0.9 + 0.7 + 0.8 = \mathbf{0.8}$

# How many models trained?

---

C: number of pipelines

K: number of folds

- To produce the final model the inner CV loop is called with  $K$  folds
  - $C$  pipelines  $\times K$  folds for estimating the winning pipeline
  - +1 times to train on the full dataset
  - $= C \times K + 1$
- To estimate the performance of the returned model
  - Run the inner CV with  $K-1$  folds,  $K$  times
  - $= (C \times (K-1) + 1) \times K$
- **Total number of models trained for model production and estimation**
- **$= C \times K^2 + K + 1$**
